# Supplementary material for: Utility of the Shortness of Breath in Daily Activities Questionnaire (SOBDA-Q) to Detect Sedentary Behavior in Patients with Chronic Obstructive Pulmonary Disease (COPD)
Source: MDPI journal article supplement (doi:10.3390/jcm12124105), 2023-06-17
Supplement: s1 [file s1]

**Supplementary Materials:**

**Table S1.** The Shortness of Breath in the Daily Activities Questionnaire (SOBDA-Q).

|                 |                                                        | I do not do it because I feel short of breath. | I am doing moderately (slowly, rest) |                                                | I'm doing as usual without adjusting.                  |                                                     |                               | I don't do it originally, so I don't know if I feel short of breath. |
|-----------------|--------------------------------------------------------|------------------------------------------------|--------------------------------------|------------------------------------------------|--------------------------------------------------------|-----------------------------------------------------|-------------------------------|----------------------------------------------------------------------|
|                 |                                                        |                                                | But I feel short of breath.          | I don't feel short of breath because I adjust. | But sometimes I feel short of breath and need to rest. | I will not feel short of breath unless I overdo it. | I don't feel short of breath. |                                                                      |
| score           |                                                        | 1                                              | 2                                    | 3                                              | 4                                                      | 5                                                   | 6                             | No evaluation                                                        |
| morning         | Brushing teeth, washing face, shaving and hairdressing |                                                |                                      |                                                |                                                        |                                                     |                               |                                                                      |
|                 | changing clothes                                       |                                                |                                      |                                                |                                                        |                                                     |                               |                                                                      |
|                 | Defecation/urination                                   |                                                |                                      |                                                |                                                        |                                                     |                               |                                                                      |
| dietary         | Eating                                                 |                                                |                                      |                                                |                                                        |                                                     |                               |                                                                      |
|                 | Meal preparation, cooking and cleanup                  |                                                |                                      |                                                |                                                        |                                                     |                               |                                                                      |
| indoor activity | Hanging the laundry /taking the laundry                |                                                |                                      |                                                |                                                        |                                                     |                               |                                                                      |
|                 | Tidying up room / Cleaning up room                     |                                                |                                      |                                                |                                                        |                                                     |                               |                                                                      |

|                    |                                                     |  |  |  |  |  |  |  |
|--------------------|-----------------------------------------------------|--|--|--|--|--|--|--|
|                    | Lifting luggage                                     |  |  |  |  |  |  |  |
| outdoor activity   | Talking while standing                              |  |  |  |  |  |  |  |
|                    | Gardening (weeding, watering)                       |  |  |  |  |  |  |  |
|                    | Washing the car                                     |  |  |  |  |  |  |  |
| recreation         | Going out on foot (walking, shopping)               |  |  |  |  |  |  |  |
|                    | Going out by bicycle (cycling, shopping)            |  |  |  |  |  |  |  |
|                    | Walking on level ground at my own pace              |  |  |  |  |  |  |  |
|                    | Walking on level ground with people of the same age |  |  |  |  |  |  |  |
|                    | Taking care of animals                              |  |  |  |  |  |  |  |
|                    | Playing with children and grandchildren             |  |  |  |  |  |  |  |
|                    | Going up the slope                                  |  |  |  |  |  |  |  |
|                    | Going up the stairs                                 |  |  |  |  |  |  |  |
| nighttime activity | Taking a shower or bath                             |  |  |  |  |  |  |  |
|                    | Washing your hair and body                          |  |  |  |  |  |  |  |
|                    | Making beds                                         |  |  |  |  |  |  |  |

**Table S2.** The SOBDA-Q scoring method (example).

|         |                                                              | I do not do it<br>because I feel<br>short of breath. | I am doing moderately (slowly,<br>rest) |                                                         | I'm doing as usual without adjusting.                           |                                                              |                                  | I don't do it<br>originally, so I<br>don't know if I<br>feel short of<br>breath. |
|---------|--------------------------------------------------------------|------------------------------------------------------|-----------------------------------------|---------------------------------------------------------|-----------------------------------------------------------------|--------------------------------------------------------------|----------------------------------|----------------------------------------------------------------------------------|
|         |                                                              |                                                      | But I feel short of<br>breath.          | I don't feel short<br>of breath<br>because I<br>adjust. | But sometimes I<br>feel short of<br>breath and need<br>to rest. | I will not feel<br>short of breath<br>unless I overdo<br>it. | I don't feel<br>short of breath. |                                                                                  |
| score   |                                                              | 1                                                    | 2                                       | 3                                                       | 4                                                               | 5                                                            | 6                                | No evaluation                                                                    |
| morning | Brushing teeth, washing<br>face, shaving and<br>hairdressing |                                                      |                                         |                                                         | ○                                                               |                                                              |                                  |                                                                                  |
|         | changing clothes                                             |                                                      |                                         |                                                         |                                                                 | ○                                                            |                                  |                                                                                  |
|         | Defecation/urination                                         |                                                      |                                         |                                                         | ○                                                               |                                                              |                                  |                                                                                  |
